# Supplementary material
Source: Research Square preprint supplement (doi:10.21203/rs.3.rs-10381802/v1)
Supplement: Supplementary file 1 [file 4e2da51303ed9ac8180ad67b.docx]

# **Supplementary material**

**Online Resource 1.** Per-finding classification of every pharmacological study located for the 62 taxa. For each finding, the study model (in vitro / in vivo / combined / clinical / review / in-silico), the extract or preparation, the target organism/system and the main qualitative outcome were extracted from the source metadata. Quantitative potency values (MIC, IC50, dose) are not included because they were reported too heterogeneously and inconsistently across the primary studies to allow reliable comparison.

| ***Scientific name*** | **Family** | ***Activity class*** | ***Study model*** | **Extract/preparation** | ***Target organism/system*** | ***Main outcome* (reference)** |
| --- | --- | --- | --- | --- | --- | --- |
| *Gossypium herbaceum L. / G. hirsutum L.* | Malvaceae | Anti-inflammatory | *In vitro* | *Cottonseed extract* | *Mouse macrophages* (RAW) | Down-regulation of inflammatory gene expression (*Cao and Sethumadhavan 2020*) |
|  |  | Antimicrobial | *In vitro* | *Phytochemical extracts* | *General bacteria* | Antimicrobial + antioxidant activity (*Ade-Ademilua and Okpoma 2018*) |
| *Lithraea molleoides* | Anacardiaceae | Antimicrobial | *In vitro* & *in vivo* | Extract | *Helicobacter pylori* | Antimicrobial + gastroprotective (*Garro et al. 2015*) |
|  |  | Anti-inflammatory | *In vivo* | Extract + isolated compounds | *Rodent inflammation* | Anti-inflammatory effect (*Gorzalczany et al. 2011*) |
| *Myracrodruon urundeuva Allemão* | Anacardiaceae | Anti-inflammatory | *In vivo* | Extract | Rodent (gastric/inflammation) | Gastroprotective + anti-inflammatory (*Galvão et al. 2018*) |
|  |  | Antibacterial | *In vitro* | *Natural products* | *General bacteria* | Antibacterial activity (*Gomes et al. 2013*) |
|  |  | Antifungal | *In vitro* | Extract | *Human vaginal* *Candida spp.* | Antifungal (vulvovaginal relevance) (*Oliveira et al. 2017*) |
| *Ruta graveolens L.* | Rutaceae | Anti-inflammatory | *In vivo* | Methanolic/ethanolic leaf | Formalin-induced inflammation (rats) | Anti-inflammatory (*Mirghazanfari et al. 2016*) |
|  |  | Antibacterial | *In vitro* | Extracts | *General bacteria* | Antibacterial + antioxidant (*Pavić et al. 2019*) |
|  |  | Antifungal | *In vitro* | *Essential oil* | Resistant *Candida strains* | Antifungal (vulvovaginal relevance) (*Donadu et al. 2021*) |
| *Aloe spp.* | Asphodelaceae | Anti-inflammatory | *In vitro* | *Aloe vera* extract | PBMCs (MMP-9) | Anti-inflammatory (MMP-9 down-regulation) (*Vijayalakshmi et al. 2012*) |
|  |  | Antibacterial | *In vitro* | *Aloe vera* | *Oral pathogens* | Disinfectant/antibacterial adjunct (*Patri and Sahu 2017*) |
|  |  | Antibacterial | *In vitro* | Leaf-latex anthrones | *General microbes* | Antimicrobial (*Minale et al. 2014*) |
|  |  | Antifungal | *In vitro* | *Aloe gel* | Fungi | Antifungal (*Zapata et al. 2013*) |
| *Stryphnodendron adstringens / S. coriaceum / S. barbatimam / S. polyphyllum* | Fabaceae | Antifungal | *Not specified* | Extract | Fungi | Antifungal (model to verify) (*Morey, 2016*) |
|  |  | Antimicrobial | *Not specified* | Extract | Bacteria | Antimicrobial (model to verify) (*Pinho et al. 2011*) |
|  |  | Antinociceptive | *In vivo* | Extract | *Rodent nociception* | Antinociceptive (*Melo et al. 2007*) |
| *Eugenia theodorae* | Myrtaceae | — | — | — | — | No pharmacological study located |
| *Anacardium occidentale* | Anacardiaceae | Anti-inflammatory | *Not specified* | *Ethyl acetate* fraction (bark) | Inflammation | Anti-inflammatory (model not specified) (*Vilar et al. 2016*) |
|  |  | Anti-inflammatory | *Not specified* | *Leaf extracts* | Inflammation/bronchi | Anti-inflammatory + bronchodilatory (*Awakan et al. 2018*) |
|  |  | Antimicrobial | *In vitro* | Flower/bark/leaf extracts | *General bacteria* | Antimicrobial + antioxidant (*da Silva et al. 2016*) |
|  |  | Antifungal | *In vitro* | Class VI chitinase (isolated) | Fungi | Antifungal protein (*Oliveira et al. 2020*) |
| *Sphagneticola trilobata (L.) Pruski* | Asteraceae | Anti-inflammatory | *In vivo* | *Kaurenoic acid* (isolated diterpene) | Mice (peritonitis/pain) | Anti-inflammatory + analgesic (*Borghi et al. 2021*) |
|  |  | Antibacterial | *In vitro* | Extract | *Human pathogenic* bacteria | Antibacterial (*Toppo et al. 2013*) |
|  |  | Antifungal | *In vitro* | Extract | *Human pathogenic* fungi | Antifungal (*Toppo et al. 2013*) |
| *Pyrostegia venusta* | Bignoniaceae | Anti-inflammatory | *In vivo* | Extract | *Vitiligo model* (preclinical) | Preclinical anti-inflammatory (*Moreira et al. 2015*) |
|  |  | Antimicrobial | *In vivo* | *Flower extract* | *In vivo* wound/microbes | Antimicrobial + wound healing (*Roy et al. 2012*) |
|  |  | Antifungal | *In vitro* | *Phenolic compounds* | Candida | Anticandidal + antioxidant (*Pereira et al. 2014*) |
| *Gentiana lutea L.* | Gentianaceae | Antimicrobial | *In vitro* | Extracts + isolated compounds | *General microbes* | Antimicrobial (*Savikin et al. 2007*) |
|  |  | Antibacterial | *In vitro* | Extract | Bacteria | Antibacterial (*Yildirim, 2019*) |
|  |  | Anti-inflammatory | *In vitro* | *Root extract* | Cell-based | Anti-apoptotic + anti-inflammatory (*Cafaro et al. 2020*) |
| *Petiveria alliacea L.* | Phytolaccaceae | Anti-inflammatory | *In vitro* | Extract | RAW264.7 macrophages | Anti-inflammatory (*Gutierrez and Hoyo-Vadillo 2017*) |
|  |  | Antibacterial | *In vitro* | *Leaf extracts* | *General bacteria* | Antibacterial (*Ochoa Pacheco et al. 2013*) |
|  |  | Antifungal | *In vitro* | Hydro-alcoholic extract | Clinical *Candida isolates* | Antifungal (vulvovaginal relevance) (*Illnait-Zaragozí et al. 2014*) |
| *Plectranthus amboinicus Lour.* | Lamiaceae | Anti-inflammatory | *In vitro* & *in vivo* | *Aqueous extract* | Cell + rodent | Analgesic + anti-inflammatory (*Chiu et al. 2012*) |
|  |  | Antibacterial | *In vitro* | *Essential oil* | *General bacteria* | Antibacterial / antibiotic-modifying (*Aguiar et al. 2015*) |
|  |  | Antifungal | *In vitro* | Extract | *Candida species* | Antifungal (*Khan et al. 2013*) |
| *Syzygium cumini (L.) Skeels* | Myrtaceae | Antifungal | *In vitro* | Extract | *Candida albicans* | Antifungal (mode of action) (*Pereira et al. 2016*) |
|  |  | Anti-inflammatory | *In vivo* | Extract | *Indomethacin gastric* ulcer (rodent) | Anti-inflammatory/gastroprotective (*Chanudom and Tangpong 2015*) |
|  |  | Antimicrobial | *In vitro* | Pulp/seed phenolic extracts | *General microbes* | Antimicrobial (*Santos et al. 2020*) |
| *Himatanthus drasticus* | Apocynaceae | Anti-inflammatory | *In vivo* | Triterpene-rich fraction | Rodent | Antinociceptive + anti-inflammatory (*De-Almeida et al. 2019*) |
| *Kalanchoe pinnata L.* | Crassulaceae | Antimicrobial | *In vitro* | Extracts | Bacteria + fungi | Antibacterial + antifungal (*Santana et al. 2016*) |
| *Plectranthus sp.* | Lamiaceae | Anti-inflammatory | *In vitro* | *Natural products* (screening) | Cell/M. tuberculosis | Antitubercular + anti-inflammatory (*Andrade et al. 2018*) |
|  |  | Antimicrobial | *In vitro* | *Silver nanoparticles* (leaf) | *General microbes* | Antimicrobial (green AgNP) (*Ajitha and Reddy 2014*) |
|  |  | Antifungal | *In vitro* | *Essential oil* | Fungi | Antifungal (*Aguiar et al. 2018*) |
| *Pelargonium odoratissimum* | Geraniaceae | Antifungal (not relevant) | *In vitro* | *Essential oil* | *Cereal phytopathogenic* fungi | No activity vs vaginal Candida (target mismatch) (*Matusinsky et al. 2015*) |
| *Hancornia speciosa Gomez* | Apocynaceae | Anti-inflammatory | *In vivo* | *Aqueous fruit* extract | Rodent | Anti-inflammatory (*Torres-Rêgo et al. 2016*) |
|  |  | Antibacterial | *In vitro* | Extract | P. aeruginosa, S. aureus | Antibacterial (*Dórea et al. 2021*) |
| *Chenopodium ambrosioides L.* | Amaranthaceae | Anti-inflammatory | *In vivo* | Extract | *Experimental osteoarthritis* (rodent) | Anti-inflammatory + analgesic (*Calado et al. 2015*) |
|  |  | Anti-inflammatory | *In vitro* & *in vivo* | Extract | *Fish immune* model | Antioxidant + anti-inflammatory (*Reyes-Becerril et al. 2019*) |
|  |  | Antibacterial | *In vitro* & *in vivo* | Extract | *Helicobacter pylori* | Antibacterial (*Ye et al. 2015*) |
| *Solanum ambrosiacum Vell.* | Solanaceae | Anti-inflammatory | *In vivo* | 31-norcycloartanones (isolated) | Rodent | Analgesic + anti-inflammatory (*Lopes et al. 2014*) |
| *Handroanthus impetiginosus* | Bignoniaceae | Antibacterial | *In vitro* | *Silver nanoparticles* (underbark) | *General bacteria* | Antibacterial (green AgNP) (*Tormena et al. 2020*) |
| *Boerhavia hirsuta* | Nyctaginaceae | Antimicrobial / anti-inflammatory / healing | Review | *Multiple extracts* | Multiple | Review of ethnomedicinal activities (*Das et al. 2023*) |
| *Bidens alba* | Asteraceae | Anti-inflammatory / antioxidant / anti-infectious | *In silico/omics* | Flavonoids/terpenoids (omics) | — | Organ-specific biosynthesis of bioactives (*Wang et al. 2025*) |
| *Bidens pilosa* | Asteraceae | Anti-inflammatory | *In vivo* | *Standardized extract* | TNBS colitis (rats) | Anti-inflammatory (*Quaglio et al. 2020*) |
|  |  | Anti-inflammatory | *In vitro* | Isookanin (isolated) | Cell-based | Anti-inflammatory mechanism (*Xin et al. 2021*) |
|  |  | Antimicrobial | *In vitro* | *Leaf extract* | *General bacteria* | Antibacterial (*Ajanaku et al. 2021*) |
|  |  | Antifungal | *In vitro* | Cytopiloyne (isolated) | Candida / macrophages | Anticandidal via macrophages (*Chung et al. 2016*) |
| *Phyllanthus flaviflorus* | Phyllanthaceae | — | — | — | — | No pharmacological study located |
| *Chamaecrista cytisoides* | Fabaceae | *No relevant* activity | *In vitro* | Extract | S. epidermidis (biofilm) | No antimicrobial effect for this species (*Trentin et al. 2011*) |
| *Hyptis pectinata* | Lamiaceae | Anti-inflammatory / antinociceptive | *In vivo* | *Essential oil* | Rodent | Anti-inflammatory + antinociceptive (*Raymundo et al. 2011*) |
|  |  | Antibacterial | *In vitro* | *Ethanolic extract* | *General bacteria* | Antibacterial + antiradical (*Vasconcelos et al. 2020*) |
| *Croton urucurana Baill.* | Euphorbiaceae | Antifungal | *In vitro* | Extract | *Candida albicans* | Antifungal (*Gurgel et al. 2005*) |
|  |  | Anti-inflammatory / antinociceptive | *In vivo* | Extract | Rodent | Antifungal + anti-inflammatory + antinociceptive (*Cordeiro, 2012*) |
| *Momordica charantia L.* | Cucurbitaceae | Anti-inflammatory | *In vivo* | Extract | *Sepsis mice* | Anti-inflammatory (*Chao et al. 2014*) |
|  |  | Antibacterial | *In vitro* | Aqueous/ethanol leaf extracts | *General bacteria* | Antibacterial (*Mada et al. 2013*) |
|  |  | Antifungal | *In vitro* | *Seed extracts* | *Fusarium solani* | Antifungal (*Wang et al. 2016*) |
| *Plantago australis* | Plantaginaceae | Anti-inflammatory | *In vitro/in* vivo + clinical | Extract | Rodent + human (clinical) | Anti-inflammatory (experimental + clinical) (*Flores et al. 2016*) |
| *Plantago major L.* | Plantaginaceae | Anti-inflammatory | *In vivo* | Extract | Rodent | Hepatoprotective + anti-inflammatory (*Türel et al. 2009*) |
| *Pluchea sagittalis* | Asteraceae | Antimicrobial | *In vitro* | *Volatile oils* | *General microbes* | Antimicrobial (*Stüker, 2007*) |
| *Kyllinga sp. (mainly Kyllinga vaginata)* | Cyperaceae | *No relevant* activity | *In vitro* | Extract | *Candida albicans* | No anti-Candida activity (*Blanc et al. 2022*) |
| *Himatanthus sucuuba* | Apocynaceae | Antimicrobial | *In vitro* | Latex | *Leishmania amazonensis* | Leishmanicidal (antiprotozoal) (*Soares et al. 2010*) |
|  |  | Anti-inflammatory | *In vitro* & *in vivo* | Plumericin (isolated) | *Intestinal inflammation* | Anti-inflammatory + antioxidant (*Rapa et al. 2020*) |
| *Tabernaemontana laeta* | Apocynaceae | — | — | — | — | No pharmacological study located |
| *Fridericia chica* | Bignoniaceae | Anti-inflammatory | *Not specified* | *Isolated flavone* | Inflammation | Anti-inflammatory (model not specified) (*Lima et al. 2018*) |
| *Licania heteromorpha Benth.* | Chrysobalanaceae | Antimicrobial | *In vitro* | *Antimicrobial triterpenoids* (isolated) | *General microbes* | Antimicrobial (*Braca et al. 2000*) |
| *Passiflora coccinea Aubl.* | Passifloraceae | Antioxidant/photoprotective | *In vitro* | Extract | — | Antioxidant + photoprotective (*Silva et al. 2020*) |
| *Passiflora foetida L.* | Passifloraceae | Anti-inflammatory / analgesic | *In vivo* | Extract | Rodent | Analgesic + anti-inflammatory (*Sasikala et al. 2011*) |
|  |  | Antimicrobial | *In vitro* | Extract | *General bacteria* | Antibacterial (*Mohanasundari, 2007*) |
| *Tapirira guianensis Aubl.* | Anacardiaceae | Antimicrobial / antiparasitic | *In vitro* | *Isolated compounds* | Protozoa + bacteria | Anti-protozoal + antibacterial (*Roumy, 2009*) |
|  |  | Antioxidant | *In vitro* | *Leaf extract* | — | Vasodilatory + antioxidant (*Rodrigues et al. 2017*) |
| *Eryngium foetidum L.* | Apiaceae | Antimicrobial / antifungal | *In vitro* | *Leaf extracts* | Bacteria + fungi | Antimicrobial + antifungal (*Lingaraju et al. 2016*) |
| *Acanthospermum australe* | Asteraceae | Antimicrobial / antifungal | *In vitro* | *Essential oils* | Bacteria + fungi | Antimicrobial + antifungal (*De Carvalho, 2014*) |
| *Dendropemon emarginatus* | Loranthaceae | — | — | — | — | No pharmacological study located |
| *Aeollanthus suaveolens* | Lamiaceae | Antimicrobial | *In vitro* | *Essential oil* (leaves) | *General microbes* | Antimicrobial + antioxidant + cytotoxic (*Martins et al. 2016*) |
| *Psidium guajava* | Myrtaceae | Antimicrobial / anti-inflammatory | *In vivo* | *Ethanolic leaf* extract | Giardia (*in vivo*) | Giardicidal + anti-inflammatory + antioxidant (*Khedr et al. 2021*) |
| *Punica granatum* | Lythraceae | Anti-inflammatory | *In vitro* | Ellagic/gallic acid, punicalagin (isolated) | Cell-based | Anti-inflammatory (*BenSaad et al. 2017*) |
|  |  | Antimicrobial | *In vitro* | *Silver nanoparticles* (peel) | *General microbes* | Antimicrobial + cytotoxic (*Devanesan et al. 2018*) |
|  |  | Antifungal | *In vitro* | PgTeL lectin (isolated) | *Candida albicans*, C. krusei | Antifungal (vulvovaginal relevance) (*Silva et al. 2018*) |
| *Anadenanthera macrocarpa* | Fabaceae | Antimicrobial | *In vitro* | Extract | *General bacteria* | Antibiotic-modulating activity (*Figueredo et al. 2013*) |
| *Allium schoenoprasum L.* | Amaryllidaceae | Anti-inflammatory | *In vivo* | *Leaf extract* | Rodent | Anti-inflammatory (*Parvu et al. 2014*) |
| *Duguetia lanceolata* | Annonaceae | Antimicrobial | *In vitro* | *Essential oils* (bark) | *General microbes* | Antimicrobial (*Sousa et al. 2012*) |
| *Cereus jamacaru* | Cactaceae | Antifungal | *In vitro* | *Protein extract* | Colletotrichum (phytopathogen) | Antifungal (ROS-mediated) (*Mota et al. 2019*) |
| *Waltheria douradinha* | Malvaceae | Antimicrobial | *In vitro* | *Quinolone alkaloids* (isolated) | *General microbes* | Antimicrobial (*Gressler et al. 2008*) |
| *Rosa sp.* | Rosaceae | Antibacterial / antitrichomonal | *In vitro* | *Petal oil*, aqueous, hydroalcoholic | *Trichomonas vaginalis* | Antibacterial + anti-Trichomonas (relevance) (*Saghafi et al. 2021*) |
|  |  | Antifungal | Clinical (RCT) | *Persian vaginal* tablet (polyherbal) | *Vulvovaginal candidiasis* (patients) | Efficacy vs placebo (double-blind RCT) (*Baery et al. 2020*) |
| *Tabebuia avellanedae* | Bignoniaceae | Anti-inflammatory | *In vivo* | *Ethanolic inner* bark | Rodent | Analgesic + anti-inflammatory (*Lee et al. 2012*) |
| *Dysphania ambrosioides* | Amaranthaceae | Anti-edematogenic | *In vivo* | Extract | *Rodent edema* | Anti-edematogenic (*Pereira, 2015*) |
|  |  | Antifungal / antibacterial | Review | *Essential oil* / extracts | Bacteria + fungi | Review (activity + toxicology) (*El Hachlafi et al. 2023*) |
|  |  | *Toxicity note* | Review | *Essential oil* | — | Toxic at high concentration (*Dagni et al. 2022*) |
| *Palicourea rigida* | Rubiaceae | Anti-inflammatory | *In vivo* | *Leaf compounds* (isolated) | Topical (rodent) | Topical anti-inflammatory (*Pinheiros et al. 2018*) |
|  |  | Antioxidant | *In vitro* | Flavonoids | — | Antioxidant (*Rosa et al. 2010*) |
| *Palicourea coriacea* | Rubiaceae | — | — | — | — | No pharmacological study located |
| *Anadenanthera sp.* | Fabaceae | Antimicrobial | *In vitro* | Hydroalcoholic/aqueous extract | *General microbes* | Antimicrobial (*Araújo, 2015*) |
|  |  | Antimicrobial | *In vitro* | *Bark extract* (phytotherapic) | *General bacteria* | Antibiotic development (*Rodrigues et al. 2014*) |
| *Brassica oleracea* | Brassicaceae | Antimicrobial | *In vitro* | *Sprout phytochemical* extract | *General microbes* | Antimicrobial (*Vale et al. 2015*) |
| *Petroselinum crispum* | Apiaceae | Antioxidant / antimicrobial | *In vitro* | Extracts | *General bacteria* | Antioxidant + antibacterial (*Wong and Kitts 2006*) |
|  |  | Antifungal | *In vitro* | *Essential oil* | Fungi + bacteria | Antifungal + antibacterial (*Linde et al. 2016*) |
| *Cochlospermum regium* | Bixaceae | Antifungal | *In vitro* | *Ethyl acetate* root fraction | Fungi | Antifungal (*Carvalho et al. 2018*) |
|  |  | Antibacterial | *In vitro* | *Ethyl acetate* root fraction | Bacteria | Antibacterial (*Carvalho et al. 2018*) |
|  |  | Antifungal / antioxidant | *In vitro* | *Essential oil* (flower) | Fungi | Antifungal + antioxidant (*Menezes Filho et al. 2020*) |
| *Pterodon pubescens Vogel* | Fabaceae | Antifungal / antimicrobial | *In vitro* | *Ethanolic bark* extract | Bacteria + fungi | Antifungal + antimicrobial (*Bustamante et al. 2010*) |

*Online Resource 1. Per-finding pharmacological evidence for the 62 taxa (108 findings and 5 evidence gaps), classified by study model, extract, target and main qualitative outcome. Quantitative potency values were not tabulated because they were reported too heterogeneously across studies to allow reliable comparison. Source: authors (2026).*
